# Supplementary material for: Uncovering the treatable burden of severe aortic stenosis in the UK
Source: PubMed Central journal article supplement — Open Heart. 2022 Jan 5;9(1):e001783. doi: 10.1136/openhrt-2021-001783 (PMC8739674; doi:10.1136/openhrt-2021-001783), 2022-01-05
Supplement: openhrt-2021-001783supp001.pdf [file openhrt-2021-001783supp001.pdf]

## SUPPLEMENTARY FIGURES

FIG S1 | POPULATION PROFILE OF THE UK IN 2019 – OVERALL AND ACCORDING TO CONSTITUENT COUNTRY

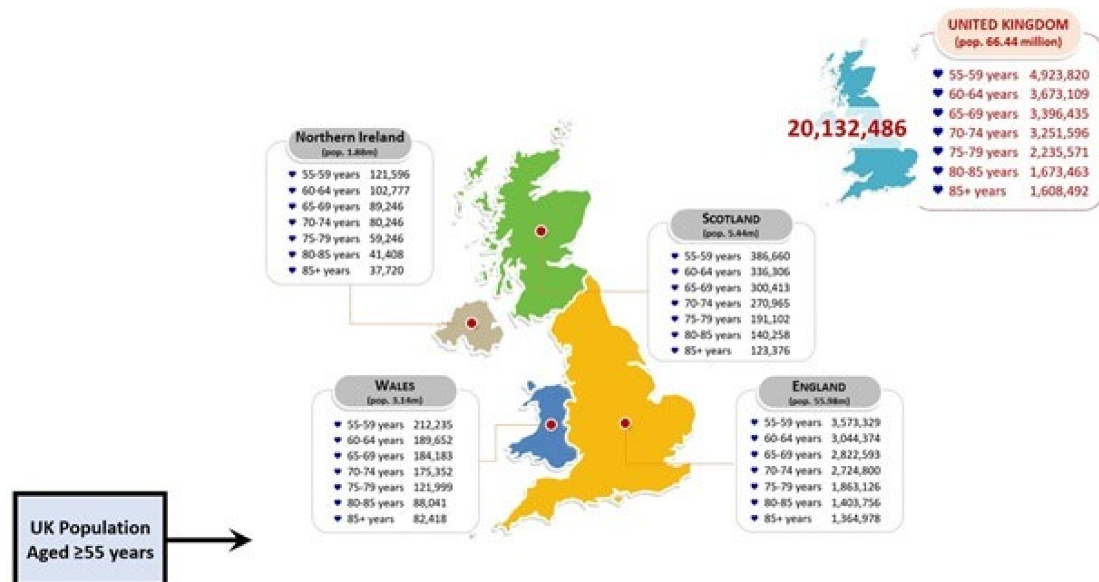

**Legend:** Summary of population data accessed from - [Population estimates for the UK, England and Wales, Scotland and Northern Ireland - Office for National Statistics \(ons.gov.uk\)](#)
